# Supplementary material for: Efficacy of tracheostomy timing in adult patients with mechanical ventilation: a systematic review and network meta-analysis
Source: Research Square preprint supplement (doi:10.21203/rs.3.rs-1588876/v1), 2022-04-28
Supplement: Supplementary file 1 [file 1aa0706c4ae0a2144cba2f66.docx]

**e-Fig. 1. Flow diagram**

**Identification of studies via other methods**

**Identification of studies via databases and registers**

Records identified from:

MEDLINE (n = 863)

CENTRAL (n = 1372)

WHO ICTRP (n = 134)

Clinicaltrials.gov (n = 175)

Update:

MEDLINE (n = 23)

CENTRAL (n = 39)

WHO ICTRP (n = 3)

Clinicaltrials.gov (n = 8)

Records identified from:

Websites (n = 0)

Organisations (n = 0)

Citation searching (n = 1)

Records removed *before screening*:

Duplicate records removed (n = 454)

Records marked as ineligible by automation tools (n = 0)

Records removed for other reasons (n = 0)

**Identification**

Records screened

(n = 2163)

Records excluded**

(n = 2075)

Reports not retrieved

(n = 0)

Reports sought for retrieval

(n = 1)

Reports sought for retrieval

(n = 88)

Reports not retrieved

(n = 0)

**Screening**

Reports excluded (n = 0)

Reports excluded:

Wrong publication type (n = 44)

Wrong study design (n = 7)

Wrong drug (n = 6)

Background article (n = 2)

Wrong outcome (n = 2)

Duplicate (n = 2)

Wrong population (n = 1)

Reports assessed for eligibility

(n = 1)

Reports assessed for eligibility

(n = 88)

Studies included in review

(n = 17)

Reports of included studies

(n = 7)

**Included**

Abbreviations: ICTRP, international clinical trials registry platform; WHO, world health organization.

**e-Table 3. Numbers of studies and patients of each outcome for pairwise comparison**

(a) Short-term mortality

| **Comparisons** | **Number of studies** | **Number of patients** |
| --- | --- | --- |
| Within 4 days vs. 5–12 days | 2 | 160 |
| Within 4 days vs. 13 days or later | 4 | 442 |
| 5–12 days vs. 13 days or later | 1 | 419 |

(b) Adverse events

| **Comparisons** | **Number of studies** | **Number of patients** |
| --- | --- | --- |
| Within 4 days vs. 5–12 days | 1 | 60 |
| Within 4 days vs. 13 days or later | 4 | 442 |
| 5–12 days vs. 13 days or later | 1 | 419 |

**e-Table 4. Characteristics of the included studies**

| **Study**  **Author year** | **Country** | **Number** | **Age [mean (SD)], years** † | **Patient characteristics (reason for ICU admission)** | **Industry funded** | **Comparison** |
| --- | --- | --- | --- | --- | --- | --- |
| Rumbak 2004 | USA | 120 | 63 (10.4) vs. 63 (9.3) | Critically ill patients (traumatic and non-traumatic patients) | No | Within 2 days after intubation vs. 14–16 days after intubation |
| Blot 2008 | France | 123 | 55 (19–88) vs. 50 (20–88) †† | Critically ill patients (traumatic and non-traumatic patients) | Yes | Within 4 days after intubation vs. 14 days or later after intubation |
| Terragni 2010 | Italy | 419 | 61.8 (17.4) vs. 61.3 (16.8) | Acute respiratory failure without pulmonary infection | Yes | 6–8 days after intubation vs. 13–15 days after intubation |
| Koch 2012 | Germany | 100 | 62.5 (39.8–76) vs. 55 (47–72) †† | After surgery | No | Within 4 days after intubation vs. 6 days or later after intubation |
| Zheng 2012 | China | 119 | 67.5 (14.7) vs. 67.9 (17.6) | Critically ill patients (traumatic and non-traumatic patients) | Unclear | 3 days after intubation vs. 15 days after intubation |
| Bösel 2013 | Germany | 60 | 61 (12) vs. 61 (13) | Severe ischemic or haemorrhagic stroke | Yes | Within 3 days after intubation vs. 7–14 days after intubation††† |
| ZORAN 2018 | Bosnia and Hercegovina | 80 | 60 (13) vs. 61.5 (28) | After surgery and trauma | Unclear | 2–4 days after intubation vs. 15 days or later after intubation |

†This sentence is described as early tracheostomy vs late tracheostomy.

††This sentence is described as early tracheostomy vs late tracheostomy and median [interquartile range (IQR)].

†††In the late tracheostomy group, tracheostomy was performed at 10.5 (9–11) days [median (IQR)] after intubation. Therefore, we included this study into the tracheostomy performed 5–12 days after intubation.

**Abbreviations:** ICU, intensive care unit; N/A, no assign; SD, standard deviation; USA, United States of America; UK, United Kingdom of Great Britain and Northern Ireland.

**e-Table 5. Comments in assessing risk of bias**

| **Study** | **Comments** |
| --- | --- |
| Rumbak 2004 | 60 patients were assigned to the late tracheostomy group, but 50 patients underwent late tracheostomy. The intention-to-treat analysis was performed, but this difference is expected to affect the assessment of outcome. |
| Blot 2008 | 62 patients were assigned to the late tracheostomy group, but only 16 patients underwent late tracheostomy. The intention-to-treat analysis was performed, but this difference is expected to affect the assessment of outcome. |
| Terragni 2010 | 210 patients were assigned to the late tracheostomy group, but only 119 patients underwent late tracheostomy. The intention-to-treat analysis was performed, but this difference is expected to affect the assessment of the outcomes. |
| Koch 2012† | The assignment of the two groups was not blinded to the patients and medical personals, but this is not expected to affect the assessment of the outcomes. |
| Zheng 2012 | 61 patients were assigned to the late tracheostomy group, but 51 patients underwent late tracheostomy. The intention-to-treat analysis was performed, but this difference is expected to affect the assessment of outcome. |
| Bösel 2013 | The assignment of the two groups was not blinded to the patients and medical personals, but this is not expected to affect the assessment of the outcomes. |
| ZORAN 2018 | There is not protocol paper, and the randomization procedure is not described in the manuscript. There was a significant difference in the presence of pneumonia and sepsis between the two groups. |

†No adverse events were evaluated in this study. Therefore, this study was only conducted for the analysis to evaluate short-term mortality.

**e-Table 6. Risk of bias within studies of each outcome in each comparison for performed tracheostomy within 4 days after intubation and 5–12 days.**

**(a) Short-term mortality**


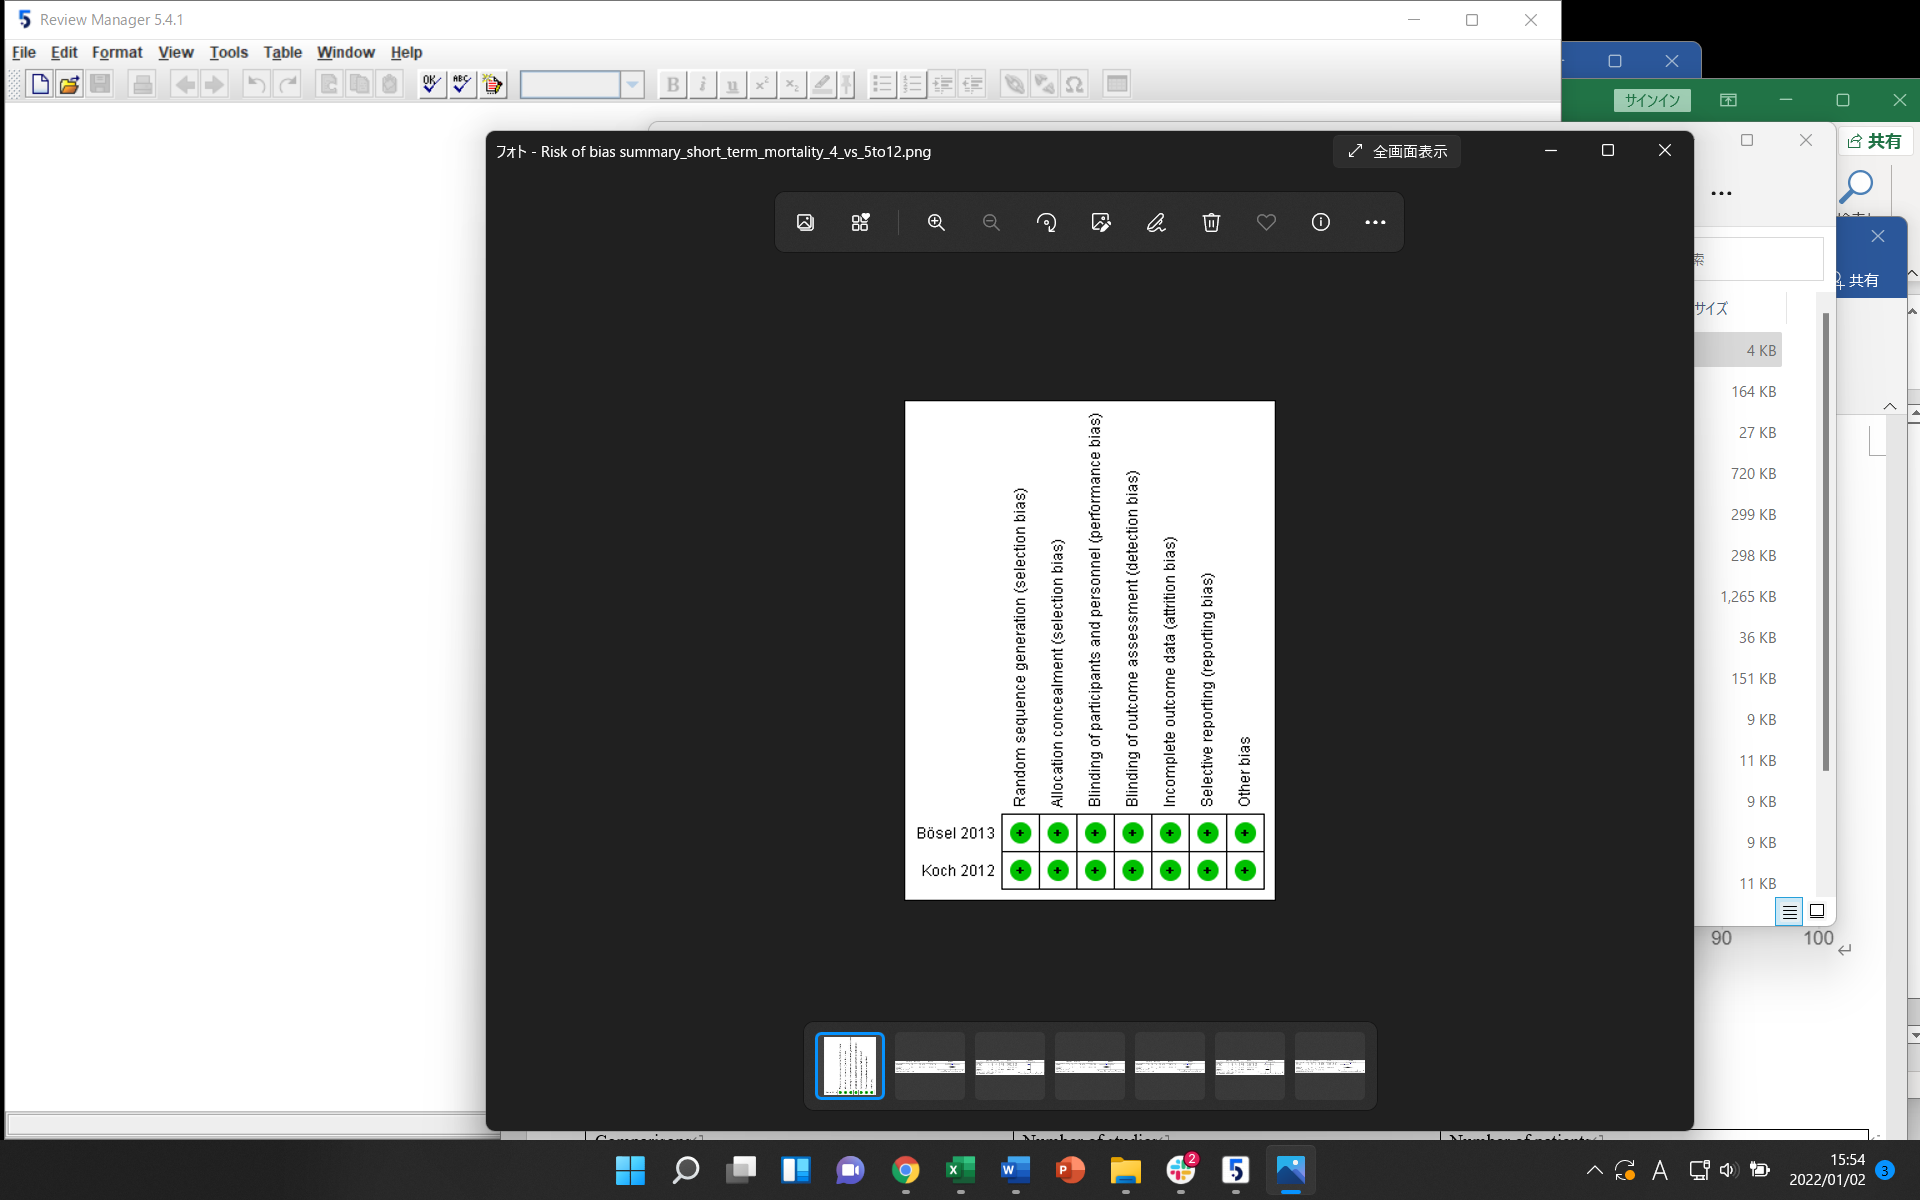


**(b) Adverse events**


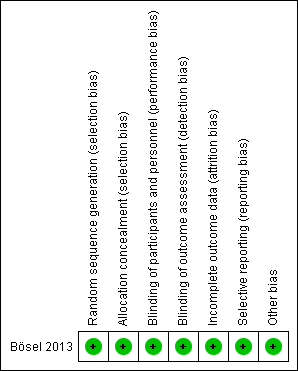


**e-Table 7. Risk of bias within studies of each outcome in each comparison for performed tracheostomy within 4 days after intubation and 13 days or later.**

**(a) Short-term mortality**


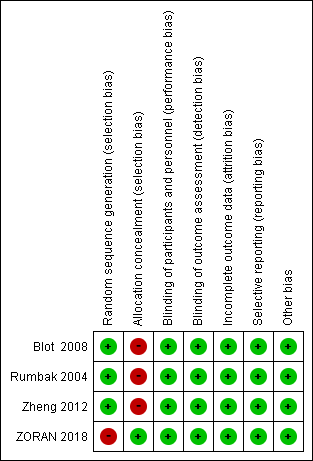


**(b) Adverse events**


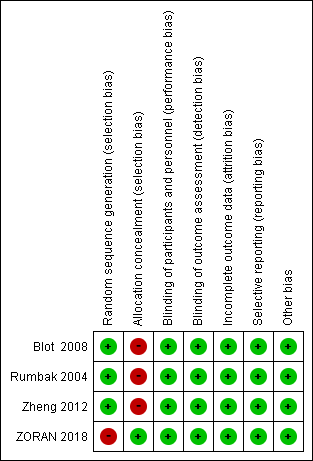


**e-Table 8. Risk of bias within studies of each outcome in each comparison for performed tracheostomy 5–12 days after intubation and 13 days or later.**

**(a) Short-term mortality**


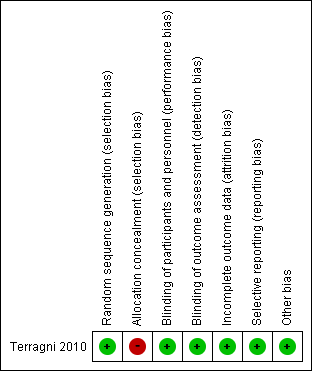


**(b) Adverse events**


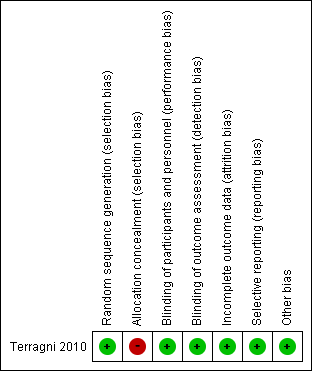


**e-Table 9. Forest plots of each outcome for on pairwise comparison for performed tracheostomy within 4 days after intubation and 5–12 days.**

**(a) Short-term mortality**


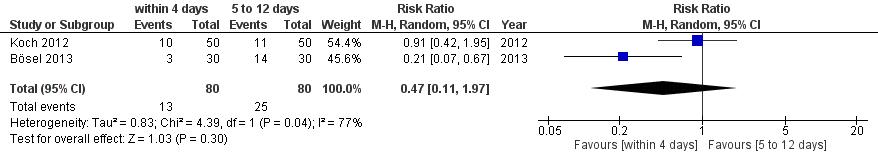


**(b) Adverse events**


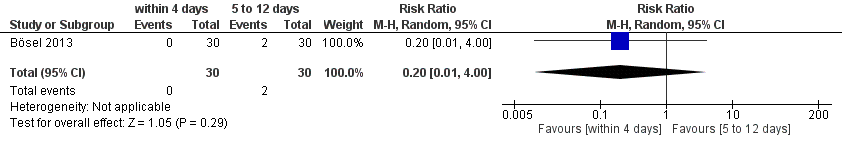


**e-Table 10. Forest plots of each outcome for the pairwise comparison for performed tracheostomy within 4 days after intubation and 13 days or later.**

**(a) Short-term mortality**


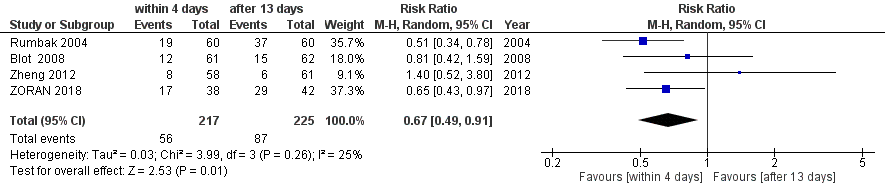


**(b) Adverse events**


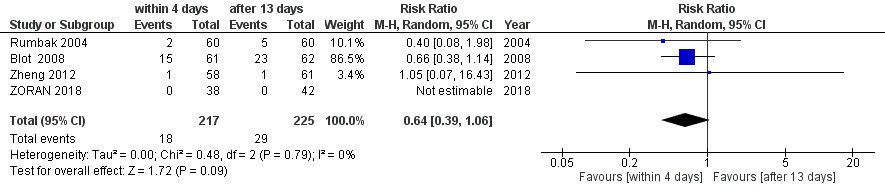


**e-Table 11. Forest plots of each outcome for pairwise comparison for performed tracheostomy 5–12 days after intubation and 13 days or later.**

**(a) Short-term mortality**


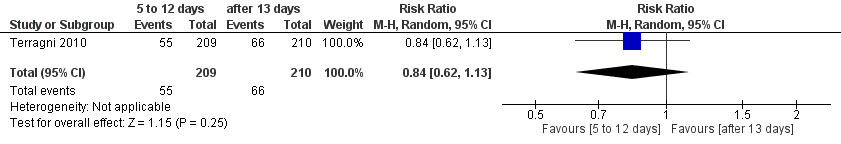


**(b) Adverse events**


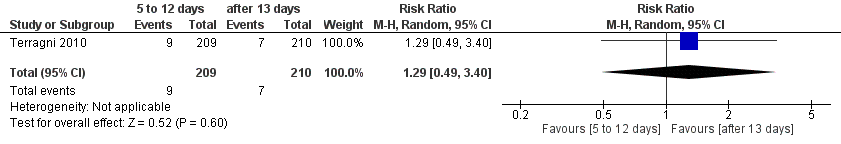


**e-Table 12. Forest plots of direct, indirect, and network meta-analysis of each outcome in each comparison for performed tracheostomy within 4 days after intubation and 5–12 days.**

**(a) Short-term mortality**

**
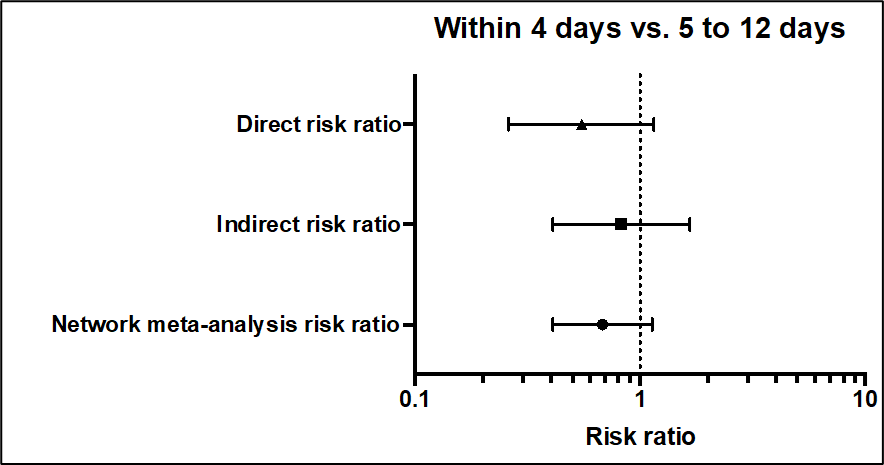
**

**(b) Adverse events**


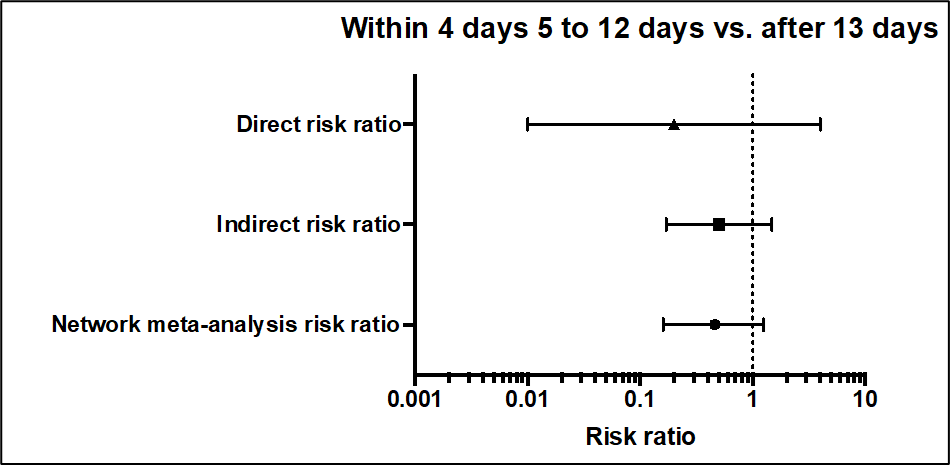


**e-Table 13. Forest plots of direct, indirect, and network meta-analysis of each outcome in each comparison for performed tracheostomy within 4 days after intubation and 13 days or later.**

**(a) Short-term mortality**

**
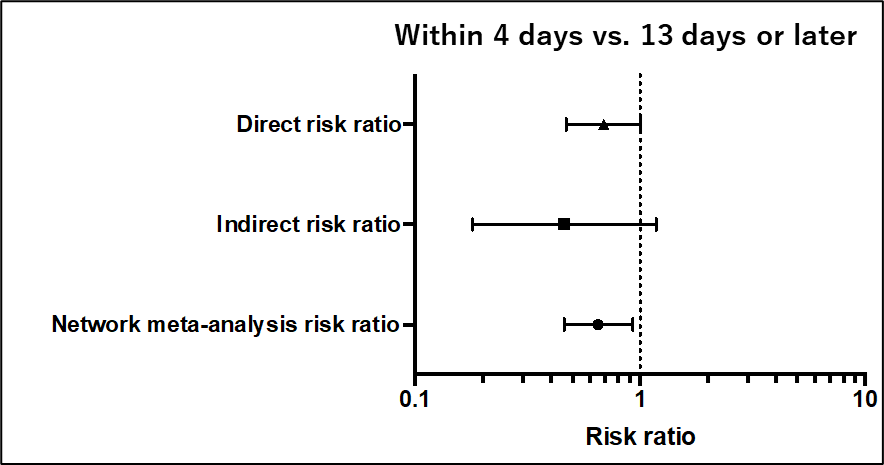
**

**(b) Adverse events**


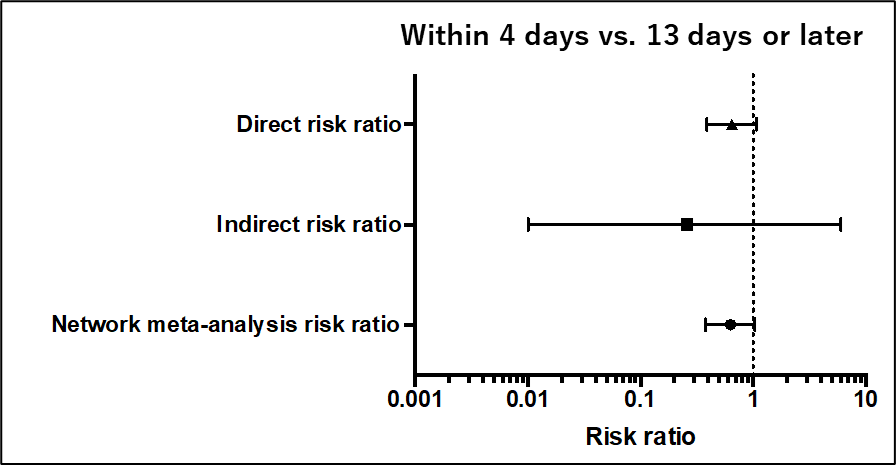


**e-Table 14. Forest plots of direct, indirect, and network meta-analysis of each outcome of each comparison for performed tracheostomy 5–12 days after intubation and 13 days or later.**

**(a) Short-term mortality**

**
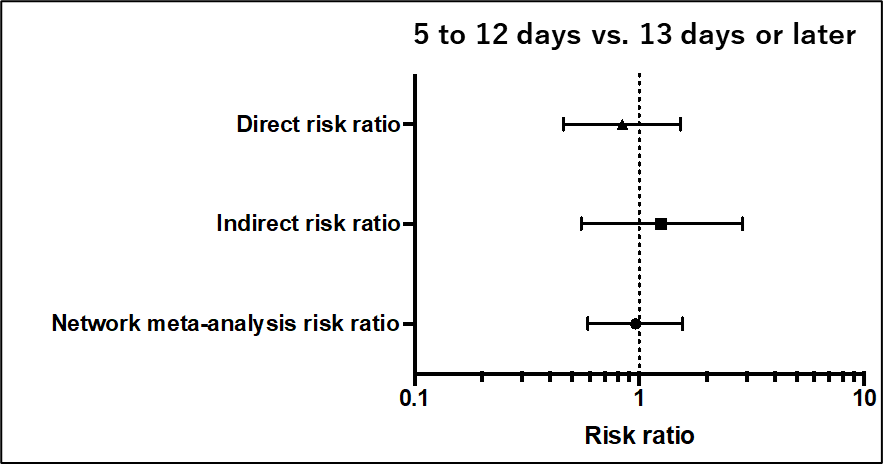
**

**(b) Adverse events**

**
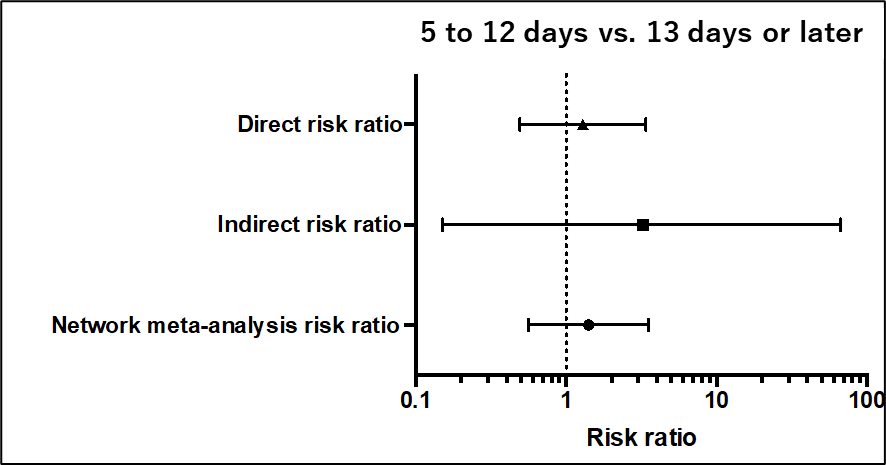
**

**e-Table 15. Inconsistency of each outcome for side split**

**(a) Short-term mortality**

Number of loops = 1.

| **Comparisons** | **Number of studies** | **RR from NMA (95% PI)** | **RR from direct comparison** | **RR from indirect comparison** | **Ratio of ratios (direct vs. indirect)** | ***p*-value** |
| --- | --- | --- | --- | --- | --- | --- |
| within 4 days vs. 5–12 days | 2 | 0.68 (0.24–1.88) | 0.47 | 0.82 | 0.57 | 0.44 |
| within 4 days vs. 13 days or later | 4 | 0.65 (0.27–1.56) | 0.67 | 0.46 | 1.46 | 0.44 |
| 5–12 days vs. 13 days or later | 1 | 0.96 (0.35–2.59) | 0.84 | 1.25 | 0.67 | 0.44 |

**Abbreviations:** PI, prediction interval; RR, risk ratio.

**(b) Adverse events**

Number of loops = 1.

| **Comparisons** | **Number of studies** | **RR from NMA (95% PI)** | **RR from direct comparison** | **RR from indirect comparison** | **Ratio of ratios (direct vs. indirect)** | ***p*-value** |
| --- | --- | --- | --- | --- | --- | --- |
| within 4 days vs. 5–12 days | 1 | 0.45 (0.08–2.38) | 0.20 | 0.50 | 0.40 | 0.57 |
| within 4 days vs. 13 days or later | 4 | 0.63 (0.28–1.41) | 0.64 | 0.26 | 2.46 | 0.57 |
| 5–12 days vs. 13 days or later | 1 | 1.41 (0.31–6.29) | 1.29 | 3.23 | 0.40 | 0.57 |

Abbreviations: PI, prediction interval; RR, risk ratio.

**e-Table 16. Inconsistency of each outcome for global**

**(a) Short-term mortality**

Q statistic to assess consistency under the assumption of a full design-by-treatment interaction random effects model = 0.59 (degrees of freedom = 1, p = 0.44) .

**(b) Adverse events**

Q statistic to assess consistency under the assumption of a full design-by-treatment interaction random effects model = 0.32 (degrees of freedom = 1, p = 0.57) .

**e-Table 17. Heterogeneity of each outcome: Between-study variance within a comparison and the network**

**(a) Short-term mortality**

| **Comparisons** | **Number of studies** | **Estimated variance** | | **Forest plot** |
| --- | --- | --- | --- | --- |
| **In comparison** | **In network** |
| Within 4 days vs. 5–12 days | 2 | 0.83 | 0.068 | Very serious heterogeneity |
| Within 4 days vs. 13 days or later | 4 | 0.03 | 0.068 | Moderate heterogeneity |
| 5–12 days vs. 13 days or later | 1 | N/A | 0.068 | N/A |

**Abbreviations:** N/A, not assigned.

**(b) Adverse events**

| **Comparisons** | **Number of studies** | **Estimated variance** | | **Forest plot** |
| --- | --- | --- | --- | --- |
| **In comparison** | **In network** |
| within 4 days vs. 5–12 days | 1 | N/A | <0.01 | N/A |
| within 4 days vs. 13 days or later | 4 | <0.01 | <0.01 | No heterogeneity |
| 5–12 days vs. 13 days or later | 1 | N/A | <0.01 | N/A |

**Abbreviations:** N/A, not assigned.
