# Supplementary material for: Efficacy of tracheostomy timing in adult patients with mechanical ventilation: a systematic review and network meta-analysis
Source: Research Square preprint supplement (doi:10.21203/rs.3.rs-1588876/v1), 2022-04-28
Supplement: Supplementary file 2 [file def8c6af0779916bc2a9a71b.docx]

**e-Table 2. Search strategies**

**MEDLINE**
#1 tracheostomy [MeSH] OR tracheotomy [MeSH]

#2 tracheosto* OR tracheoto*

#3 randomized controlled trial [pt] OR controlled clinical trial [pt] OR randomized [tiab] OR placebo [tiab] OR clinical trials as topic [mesh: noexp] OR randomly [tiab] OR trial [ti]

#4 animals [mh] NOT humans[mh]

#5 #3 NOT #4

#6 (#1 OR #2) AND #5

**CENTRAL**
#1 MeSH descriptor: [Tracheostomy] explode all trees

#2 MeSH descriptor: [Tracheotomy] explode all trees

#3 tracheosto* OR tracheoto*

#4 #1 OR #2 OR #3

**Trial Registry: World Health Organization, International Clinical Trials Registry Platform**

Advanced Search >

Title: tracheosto* OR tracheoto*

OR Conditions: tracheosto* OR tracheoto*

OR Intervention: tracheosto* OR tracheoto*

Recruitment status: ALL

Phases: All

**Trial Registry: ClinicalTrials.gov**

Advanced Search >

Condition or Disease: tracheostomy OR tracheostomies OR tracheotomy OR tracheotomies

Study Type: All Studies

Study Results: All Studies
